# Supplementary material
Source: PubMed Central journal article supplement (PMC3699439)
Supplement: supp_djt140_jnci_JNCI_12_2025_s01.pdf [file supp_djt140_jnci_JNCI_12_2025_s01.pdf]

**Supplementary Table 1.** Patient Characteristics: NSABP C-08

| <b>Characteristic</b>   | <b>Trial Eligible<br/>N=2673</b> |          | <b>Study Subset<br/>N=2159</b> |          | <b>P-value*</b> |
|-------------------------|----------------------------------|----------|--------------------------------|----------|-----------------|
|                         | <b>N</b>                         | <b>%</b> | <b>N</b>                       | <b>%</b> |                 |
| Age                     |                                  |          |                                |          |                 |
| < 50                    | 674                              | 25.2     | 538                            | 24.9     | 0.97            |
| 50 - 59                 | 882                              | 33.0     | 714                            | 33.1     |                 |
| 60 - 69                 | 713                              | 26.7     | 584                            | 27.0     |                 |
| 70 +                    | 404                              | 15.1     | 323                            | 15.0     |                 |
| Sex                     |                                  |          |                                |          |                 |
| Female                  | 1342                             | 50.2     | 1067                           | 49.4     | 0.47            |
| Male                    | 1331                             | 49.8     | 1092                           | 50.6     |                 |
| Race                    |                                  |          |                                |          |                 |
| White                   | 2333                             | 87.3     | 1897                           | 87.9     | 0.86            |
| Black                   | 215                              | 8.0      | 170                            | 7.9      |                 |
| Other                   | 93                               | 3.5      | 69                             | 3.2      |                 |
| Multi-racial            | 3                                | 0.1      | 3                              | 0.1      |                 |
| Unknown                 | 29                               | 1.1      | 20                             | 0.9      |                 |
| ECOG Performance        |                                  |          |                                |          |                 |
| 0 Fully active          | 2164                             | 81.0     | 1736                           | 80.4     | 0.49            |
| 1 No strenuous activity | 508                              | 19.0     | 423                            | 19.6     |                 |
| Nodal Stage             |                                  |          |                                |          |                 |
| N0 (node negative)      | 666                              | 24.9     | 530                            | 24.5     | 0.92            |
| N1 (1-3 pos. nodes)     | 1218                             | 45.6     | 990                            | 45.9     |                 |
| N2 (4+ pos. nodes)      | 789                              | 29.5     | 639                            | 29.6     |                 |
| Treatment               |                                  |          |                                |          |                 |
| mFOLFOX6                | 1338                             | 50.1     | 1090                           | 50.5     | 0.69            |
| mFOLFOX6+Bev            | 1335                             | 49.9     | 1069                           | 49.5     |                 |

\* Pearson Chi Squared test of whether the study subset is a representative sample of the trial-eligible patients.
